# Supplementary material for: Systemic Control of Cell Division and Endoreduplication by NAA and BAP by Modulating CDKs in Root Tip Cells ofAllium cepa
Source: Hindawi journal article supplement (doi:10.1155/2014/453707), 2014-01-01
Supplement: f1 [file 453707.f1.pdf]

**Time Colchicine Colchicine+NAA Colchicine+BAP**

**24h**

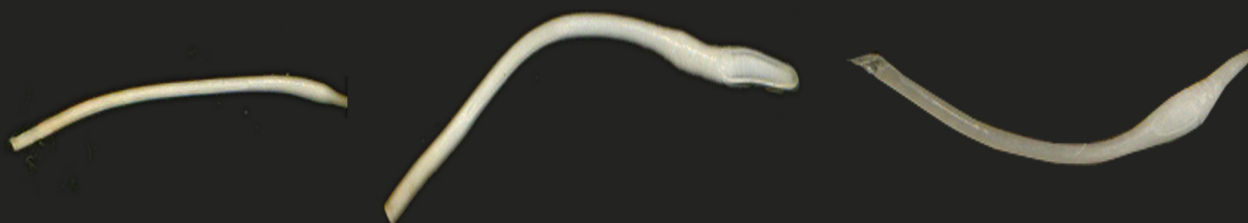

**48h**

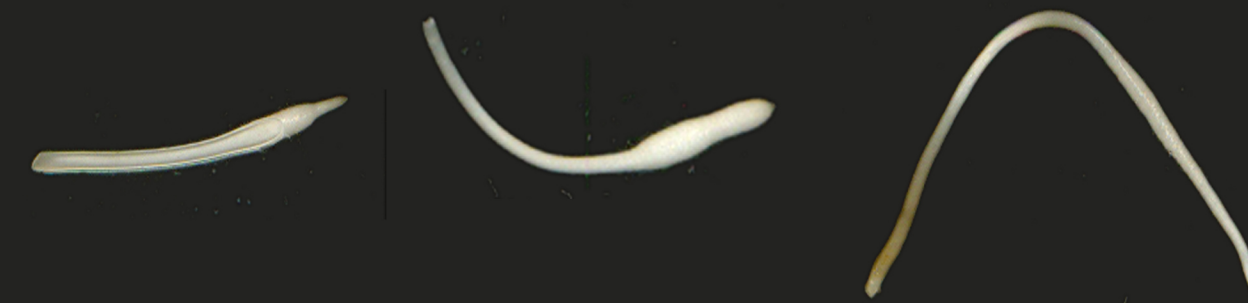

**72h**

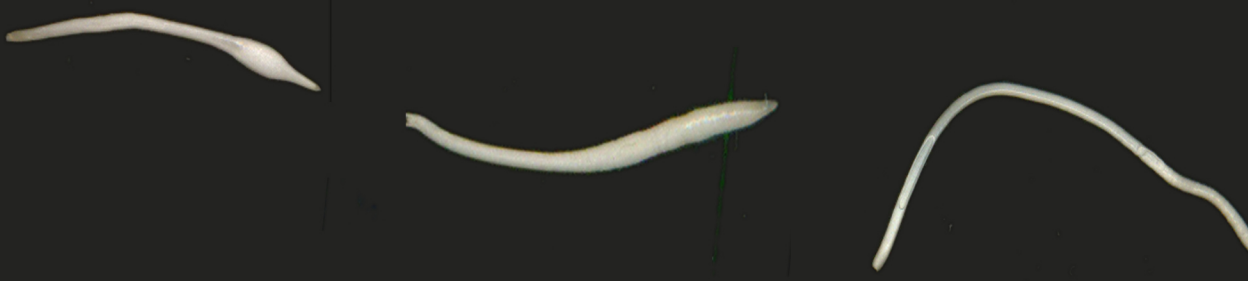

**96h**

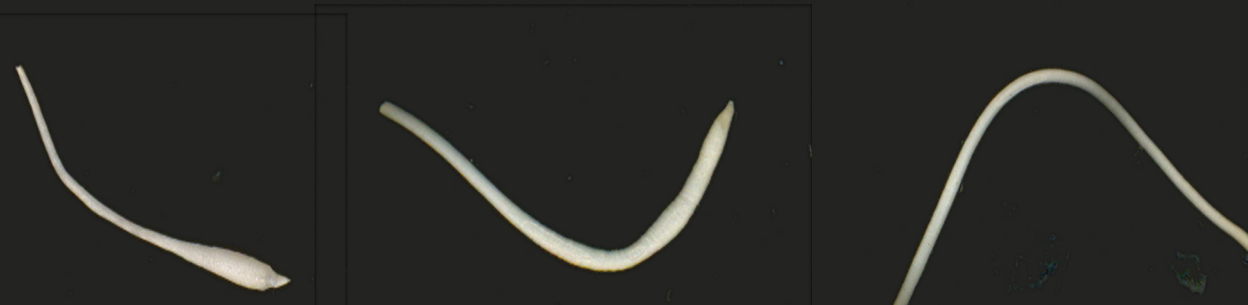

**120h**

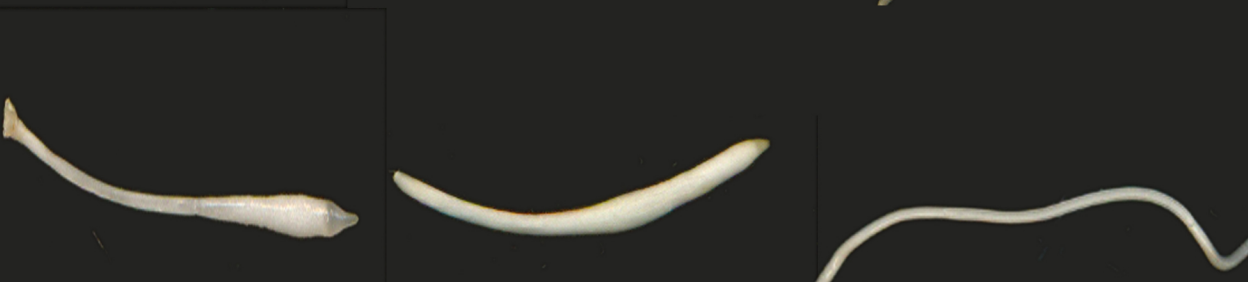

**Normal root**

**NAA**

**BAP**

**120h**

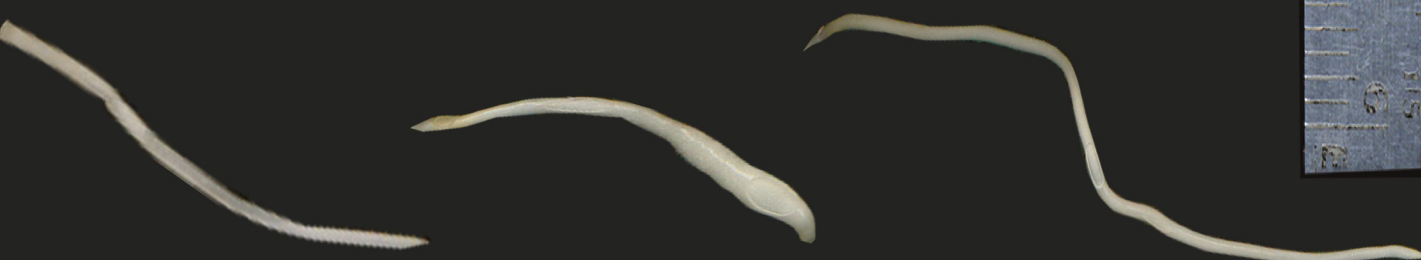

**Supplementary data figure: 10 shows changes in morphology of roots after colchicine, NAA and BAP treatment**

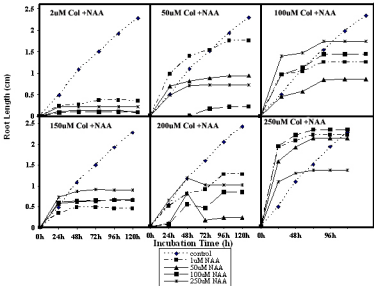

Supplementary data figure: II shows changes in length of endoreduplicated roots after NAA treatment

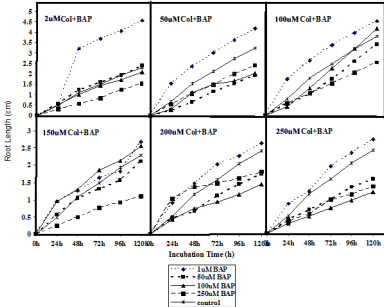

Supplementary data figure: 12 shows changes in length of endoreduplicated roots after BAP treatment
